# Supplementary material
Source: publisher figshare collection journal article supplement (https://asha.figshare.com/ndownloader/files/38403812)
Supplement: Supplementary file 1 [file 38403812]

## Supplemental Material S1. Survey items and response scoring.

| Sections and Questions                                                                                                                                         | Response Type/Response Options                            | Response Score |
|----------------------------------------------------------------------------------------------------------------------------------------------------------------|-----------------------------------------------------------|----------------|
| <b>Recommendations</b>                                                                                                                                         |                                                           |                |
| <b>Rec-1:</b> Did any professional discourage you, or raised concerns about raising your child orally bilingual?                                               | Yes                                                       | → 1            |
|                                                                                                                                                                | No                                                        | → 0            |
| <b>Rec-2:</b> Did any family member, friend or any other member of the community discourage you, or raised concerns about raising your child orally bilingual? | Yes                                                       | → 1            |
|                                                                                                                                                                | No                                                        | → 0            |
| <b>Rec-3:</b> Did any professional encouraged you to raise your child orally bilingual?                                                                        | Yes                                                       | → 1            |
|                                                                                                                                                                | No                                                        | → 0            |
| <b>Rec-4:</b> Did any family member, friend or any other member of the community encouraged you to raise your child orally bilingual?                          | Yes                                                       | → 1            |
|                                                                                                                                                                | No                                                        | → 0            |
| <b>Caregiver Beliefs on Oral Bilingualism</b>                                                                                                                  |                                                           |                |
| <b>BilBel-1:</b> Children receive better education when they learn two oral languages.                                                                         | 5-point scale                                             | 1-5            |
| <b>BilBel-2:</b> It is natural for children to speak a second language                                                                                         | 5-point scale                                             | 1-5            |
| <b>BilBel-3:</b> Children who are orally bilingual will have better job opportunities as adults                                                                | 5-point scale                                             | 1-5            |
| <b>BilBel-4:</b> It is important for my child to communicate with my immediate family in Spanish                                                               | 5-point scale                                             | 1-5            |
| <b>BilBel-5:</b> It is important that my child retains Spanish into adulthood.                                                                                 | 5-point scale                                             | 1-5            |
| <b>BilBel-6:</b> It is important that my child knows how to read and write in Spanish                                                                          | 5-point scale                                             | 1-5            |
| <b>BilBel-7:</b> My family’s beliefs are influenced by the Latino culture                                                                                      | 5-point scale                                             | 1-5            |
| <b>BilBel-8:</b> Which of the following most represents your beliefs for your child’s oral language development                                                | Spanish fluency is more important                         | → 0            |
|                                                                                                                                                                | Spanish fluency is slightly more important                | → 1            |
|                                                                                                                                                                | Spanish fluency and English fluency are equally important | → 1            |

|                                                                                                                                                  |                                            |     |
|--------------------------------------------------------------------------------------------------------------------------------------------------|--------------------------------------------|-----|
|                                                                                                                                                  | English fluency is slightly more important | → 1 |
|                                                                                                                                                  | English fluency is more important          | → 0 |
| <b>BilBel-9:</b> Children who are deaf or hard of hearing have the capacity to develop skills in two oral languages                              | 5-point scale                              | 1-5 |
| <b>BilBel-10:</b> Children who are deaf or hard of hearing get confused by being exposed to two oral languages *                                 | 5-point scale                              | 1-5 |
| <b>BilBel-11:</b> Learning two oral languages is too challenging for children who are deaf or hard of hearing *                                  | 5-point scale                              | 1-5 |
| <b>Caregiver Beliefs on ASL</b>                                                                                                                  |                                            |     |
| <b>BilBel<sub>ASL</sub>:</b> Learning sign language, in addition to an oral language, is beneficial for children who are deaf or hard of hearing | 5-point scale                              | 1-5 |
| <b>Practices:</b>                                                                                                                                |                                            |     |
| <b><u>Spanish</u></b>                                                                                                                            |                                            |     |
| <b>SpaPra-1:</b> How frequently do you or any other family member speak Spanish at home?                                                         | 5-point scale                              | 1-5 |
| <b>SpaPra-2:</b> How frequently do you or any other family member read to your child in Spanish at home?                                         | 5-point scale                              | 1-5 |
| <b>SpaPra-3:</b> How frequently do you, your child or any other family member watch TV or electronic media in Spanish at home?                   | 5-point scale                              | 1-5 |
| <b>SpaPra-4:</b> How frequently does your child attend events in the community in which Spanish is used?                                         | 5-point scale                              | 1-5 |
| <b><u>English</u></b>                                                                                                                            |                                            |     |
| <b>EngPra-1:</b> How frequently do you or any other family member speak English at home?                                                         | 5-point scale                              | 1-5 |
| <b>EngPra-2:</b> How frequently do you or any other family member read to your child in English at home?                                         | 5-point scale                              | 1-5 |
| <b>EngPra-3:</b> How frequently do you or any other family member watch TV or electronic media in English at home?                               | 5-point scale                              | 1-5 |

|                                                                                                          |               |     |
|----------------------------------------------------------------------------------------------------------|---------------|-----|
| <b>EngPra-4:</b> How frequently does your child attend events in the community in which English is used? | 5-point scale | 1-5 |
|----------------------------------------------------------------------------------------------------------|---------------|-----|

### ASL

|                                                                                                |               |     |
|------------------------------------------------------------------------------------------------|---------------|-----|
| <b>ASLPra-1:</b> How frequently do you or any other family member speak sign language at home? | 5-point scale | 1-5 |
|------------------------------------------------------------------------------------------------|---------------|-----|

|                                                                                                                          |               |     |
|--------------------------------------------------------------------------------------------------------------------------|---------------|-----|
| <b>ASLPra-2:</b> How frequently do you or any other family member watch TV or electronic media in sign language at home? | 5-point scale | 1-5 |
|--------------------------------------------------------------------------------------------------------------------------|---------------|-----|

|                                                                                                                |               |     |
|----------------------------------------------------------------------------------------------------------------|---------------|-----|
| <b>ASLPra-3:</b> How frequently does your child attend events in the community in which sign language is used? | 5-point scale | 1-5 |
|----------------------------------------------------------------------------------------------------------------|---------------|-----|

## **Language Proficiency:**

### Spanish

|                                                                |               |     |
|----------------------------------------------------------------|---------------|-----|
| <b>SpaProf-1:</b> My child’s speaking ability in Spanish is... | 5-point scale | 1-5 |
|----------------------------------------------------------------|---------------|-----|

|                                                                  |               |     |
|------------------------------------------------------------------|---------------|-----|
| <b>SpaProf-2:</b> My child’s ability understanding Spanish is... | 5-point scale | 1-5 |
|------------------------------------------------------------------|---------------|-----|

|                                                            |               |     |
|------------------------------------------------------------|---------------|-----|
| <b>SpaProf-3:</b> My child’s ability reading Spanish is... | 5-point scale | 1-5 |
|------------------------------------------------------------|---------------|-----|

### English

|                                                                |               |     |
|----------------------------------------------------------------|---------------|-----|
| <b>EngProf-1:</b> My child’s speaking ability in English is... | 5-point scale | 1-5 |
|----------------------------------------------------------------|---------------|-----|

|                                                                  |               |     |
|------------------------------------------------------------------|---------------|-----|
| <b>EngProf-2:</b> My child’s ability understanding English is... | 5-point scale | 1-5 |
|------------------------------------------------------------------|---------------|-----|

|                                                            |               |     |
|------------------------------------------------------------|---------------|-----|
| <b>EngProf-3:</b> My child’s ability reading English is... | 5-point scale | 1-5 |
|------------------------------------------------------------|---------------|-----|

### ASL

|                                                                      |               |     |
|----------------------------------------------------------------------|---------------|-----|
| <b>SigProf-1:</b> My child’s speaking ability in sign language is... | 5-point scale | 1-5 |
|----------------------------------------------------------------------|---------------|-----|

|                                                                        |               |     |
|------------------------------------------------------------------------|---------------|-----|
| <b>SigProf-2:</b> My child’s ability understanding sign language is... | 5-point scale | 1-5 |
|------------------------------------------------------------------------|---------------|-----|

---

*Note.* ASL = American Sign Language; Rec = Recommendations; BilBel = Bilingual beliefs on two oral languages; BilBel<sub>ASL</sub> = Bilingual beliefs on one oral language and American Sign Language; SpaPra = Spanish practices; EngPra = English practices; ASLPra = American Sign Language practices; SpaProf = Spanish proficiency; EngProf = English proficiency; ASLProf = American Sign Language proficiency. Five-point scale response types: for Beliefs questions were from 1 = *Totally Disagree* to 5 = *Totally Agree*; for Practices questions were from 1 = *Never* to 5 = *Always*; for Language Proficiency questions were from 1 = *Very Poor* to 5 = *Excellent*. Questions marked with an asterisk (\*) indicate reverse scoring.
